# Supplementary material
Source: MDPI journal article supplement (https://www.mdpi.com/2073-4433/11/3/238)
Supplement: s1 [file s1]

Supplementary

## First Evidences of Methyl Chloride ( $\text{CH}_3\text{Cl}$ ) Transport from the Northern Italy Boundary Layer during Summer 2017

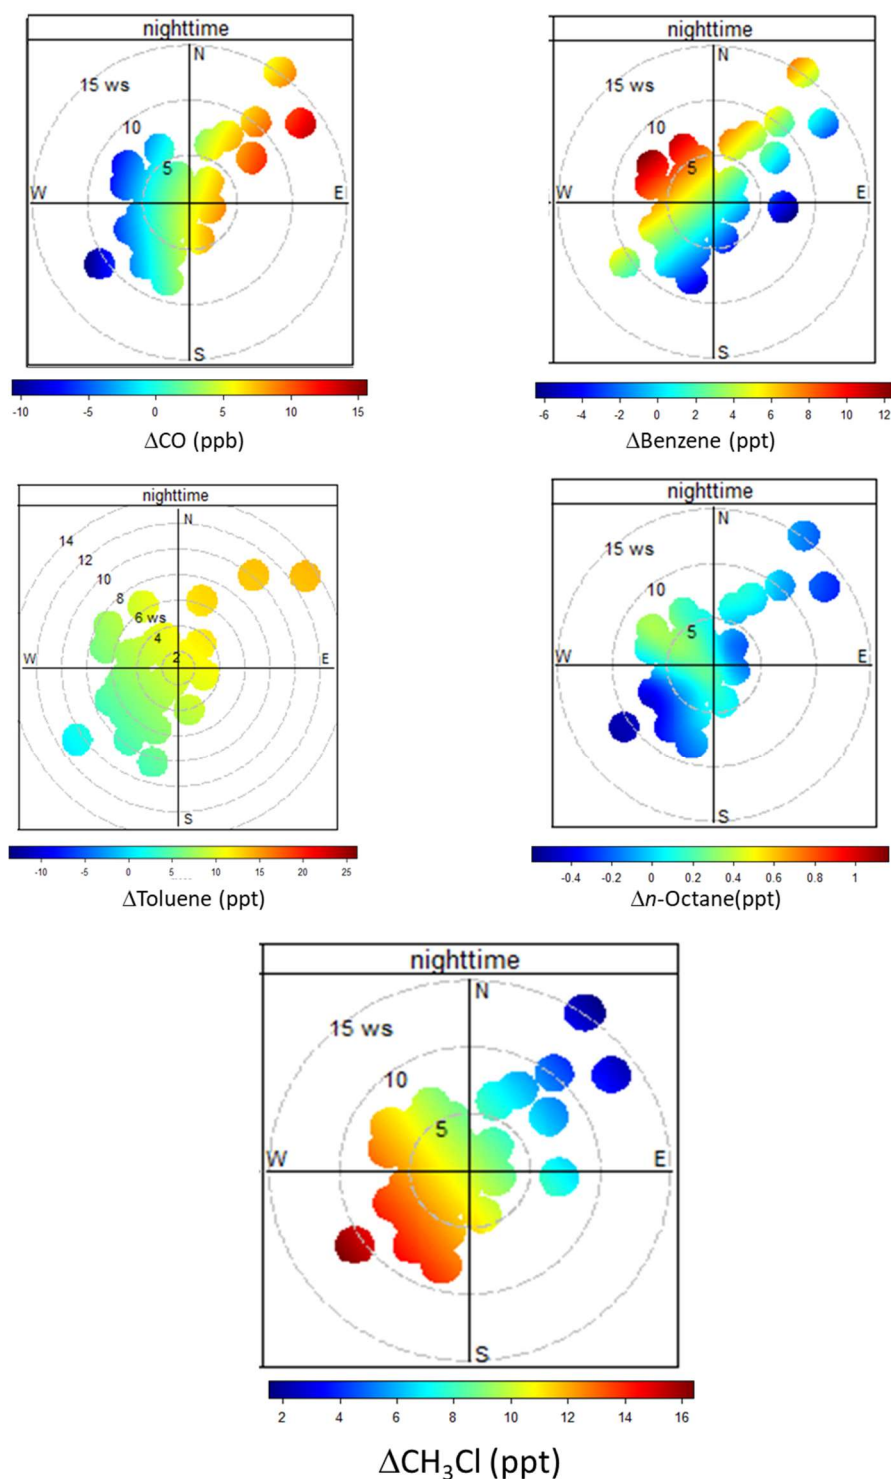

**Figure S1.** Bivariate analysis of mean average residuals of  $\text{CH}_3\text{Cl}$ , CO, benzene, toluene, and n-octane for  $\text{CH}_3\text{Cl}$  enhancement events (i.e. positive residuals) during summer 2017 (nighttime).
